# Supplementary material for: Patients With IBD Receiving Methotrexate Are at Higher Risk of Liver Injury Compared With Patients With Non-IBD Diseases: A Meta-Analysis and Systematic Review
Source: PubMed Central journal article supplement (PMC8645797; doi:10.3389/fmed.2021.774824), 2021-11-22

| Study              | Events | Total | Proportion | 95%-CI       | Weight (fixed) | Weight (random) |
|--------------------|--------|-------|------------|--------------|----------------|-----------------|
| Williams, H. J.    | 12     | 220   | 0.05       | [0.03; 0.09] | 0.8%           | 0.8%            |
| Willkens, R. F.    | 2      | 136   | 0.01       | [0.00; 0.05] | 0.5%           | 0.8%            |
| Weinblatt, M. E.   | 1      | 26    | 0.04       | [0.00; 0.20] | 0.1%           | 0.4%            |
| Weinblatt, M. E.   | 6      | 138   | 0.04       | [0.02; 0.09] | 0.5%           | 0.8%            |
| Drosos, A. A.      | 6      | 137   | 0.04       | [0.02; 0.09] | 0.5%           | 0.8%            |
| Wallace, C. A.     | 3      | 23    | 0.13       | [0.03; 0.34] | 0.1%           | 0.4%            |
| McKendry, R. J.    | 13     | 94    | 0.14       | [0.08; 0.22] | 0.3%           | 0.7%            |
| Shergy, W. J.      | 5      | 210   | 0.02       | [0.01; 0.05] | 0.7%           | 0.8%            |
| Tishler, M.        | 0      | 44    | 0.00       | [0.00; 0.08] | 0.2%           | 0.6%            |
| Leonard, P. A.     | 8      | 163   | 0.05       | [0.02; 0.09] | 0.6%           | 0.8%            |
| Kremer, J. M.      | 0      | 29    | 0.00       | [0.00; 0.12] | 0.1%           | 0.5%            |
| Williams, H. J.    | 18     | 95    | 0.19       | [0.12; 0.28] | 0.3%           | 0.7%            |
| Weinstein, A.      | 0      | 25    | 0.00       | [0.00; 0.14] | 0.1%           | 0.4%            |
| Hoffmeister, R. T. | 2      | 78    | 0.03       | [0.00; 0.09] | 0.3%           | 0.7%            |
| O'Dell, J. R.      | 0      | 36    | 0.00       | [0.00; 0.10] | 0.1%           | 0.5%            |
| Schnabel, A.       | 4      | 185   | 0.02       | [0.01; 0.05] | 0.7%           | 0.8%            |
| Boers, M.          | 0      | 76    | 0.00       | [0.00; 0.05] | 0.3%           | 0.7%            |
| Haagsma, C. J.     | 7      | 71    | 0.10       | [0.04; 0.19] | 0.3%           | 0.7%            |
| Strand, V.         | 8      | 182   | 0.04       | [0.02; 0.08] | 0.6%           | 0.8%            |
| Coleiro, B.        | 4      | 33    | 0.12       | [0.03; 0.28] | 0.1%           | 0.5%            |
| Baraldo, M.        | 0      | 30    | 0.00       | [0.00; 0.12] | 0.1%           | 0.5%            |
| Lerndal, T.        | 11     | 50    | 0.22       | [0.12; 0.36] | 0.2%           | 0.6%            |
| Emery, P.          | 5      | 320   | 0.02       | [0.01; 0.04] | 1.1%           | 0.9%            |
| Hirshberg, B.      | 0      | 33    | 0.00       | [0.00; 0.11] | 0.1%           | 0.5%            |
| van Ede, A. E.     | 11     | 274   | 0.04       | [0.02; 0.07] | 1.0%           | 0.9%            |
| van Ede, A. E.     | 30     | 236   | 0.13       | [0.09; 0.18] | 0.8%           | 0.9%            |
| van Ede, A. E.     | 15     | 113   | 0.13       | [0.08; 0.21] | 0.4%           | 0.8%            |
| Pandya, S.         | 0      | 80    | 0.00       | [0.00; 0.05] | 0.3%           | 0.7%            |
| Fathi, N. H.       | 0      | 192   | 0.00       | [0.00; 0.02] | 0.7%           | 0.8%            |
| Kremer, J. M.      | 0      | 133   | 0.00       | [0.00; 0.03] | 0.5%           | 0.8%            |
| van Ede, A. E.     | 14     | 103   | 0.14       | [0.08; 0.22] | 0.4%           | 0.7%            |
| Weinblatt, M. E.   | 0      | 271   | 0.00       | [0.00; 0.01] | 1.0%           | 0.9%            |
| Weisman, M. H.     | 0      | 60    | 0.00       | [0.00; 0.06] | 0.2%           | 0.6%            |
| Kremer, J.         | 2      | 133   | 0.02       | [0.00; 0.05] | 0.5%           | 0.8%            |
| Silverman, E.      | 1      | 47    | 0.02       | [0.00; 0.11] | 0.2%           | 0.6%            |
| Yazici, Y.         | 0      | 182   | 0.00       | [0.00; 0.02] | 0.6%           | 0.8%            |
| O'Dell, J. R.      | 2      | 64    | 0.03       | [0.00; 0.11] | 0.2%           | 0.6%            |
| Wessels, J. A.     | 3      | 205   | 0.01       | [0.00; 0.04] | 0.7%           | 0.8%            |
| Maini, R. N.       | 5      | 200   | 0.03       | [0.01; 0.06] | 0.7%           | 0.8%            |
| Tilling, L.        | 7      | 550   | 0.01       | [0.01; 0.03] | 2.0%           | 0.9%            |
| Takatori, R.       | 4      | 124   | 0.03       | [0.01; 0.08] | 0.4%           | 0.8%            |
| Drozdziak, M.      | 10     | 174   | 0.06       | [0.03; 0.10] | 0.6%           | 0.8%            |
| van Dongen, H.     | 0      | 55    | 0.00       | [0.00; 0.06] | 0.2%           | 0.6%            |
| Mor, A.            | 0      | 44    | 0.00       | [0.00; 0.08] | 0.2%           | 0.6%            |
| Nishimoto, N.      | 0      | 62    | 0.00       | [0.00; 0.06] | 0.2%           | 0.6%            |
| Keystone, E. C.    | 0      | 311   | 0.00       | [0.00; 0.01] | 1.1%           | 0.9%            |
| Cohen, S. B.       | 3      | 53    | 0.06       | [0.01; 0.16] | 0.2%           | 0.6%            |
| Lee, S. S.         | 2      | 74    | 0.03       | [0.00; 0.09] | 0.3%           | 0.7%            |
| Jones, G.          | 2      | 284   | 0.01       | [0.00; 0.03] | 1.0%           | 0.9%            |
| Alten, R. E.       | 2      | 327   | 0.01       | [0.00; 0.02] | 1.2%           | 0.9%            |
| Verstappen, S. M.  | 7      | 289   | 0.02       | [0.01; 0.05] | 1.0%           | 0.9%            |
| Lie, E.            | 40     | 1218  | 0.03       | [0.02; 0.04] | 4.3%           | 1.0%            |
| Dervieux, T.       | 0      | 255   | 0.00       | [0.00; 0.01] | 0.9%           | 0.9%            |
| Migliore, A.       | 0      | 21    | 0.00       | [0.00; 0.16] | 0.1%           | 0.4%            |
| Salesi, M.         | 0      | 117   | 0.00       | [0.00; 0.03] | 0.4%           | 0.8%            |
| Tanaka, Y.         | 4      | 136   | 0.03       | [0.01; 0.07] | 0.5%           | 0.8%            |
| Kremer, J. M.      | 6      | 507   | 0.01       | [0.00; 0.03] | 1.8%           | 0.9%            |
| Cáliz, R.          | 13     | 468   | 0.03       | [0.01; 0.05] | 1.7%           | 0.9%            |
| Mease, P.          | 0      | 33    | 0.00       | [0.00; 0.11] | 0.1%           | 0.5%            |
| Takeuchi, T.       | 2      | 176   | 0.01       | [0.00; 0.04] | 0.6%           | 0.8%            |
| Chen, X. X.        | 0      | 264   | 0.00       | [0.00; 0.01] | 0.9%           | 0.9%            |
| Plaza-Plaza, J. C. | 21     | 53    | 0.40       | [0.26; 0.54] | 0.2%           | 0.6%            |
| Dirven, L.         | 9      | 498   | 0.02       | [0.01; 0.03] | 1.8%           | 0.9%            |
| Burmester, G. R.   | 0      | 399   | 0.00       | [0.00; 0.01] | 1.4%           | 0.9%            |
| Bird, P.           | 6      | 1967  | 0.00       | [0.00; 0.01] | 7.0%           | 1.0%            |
| Chen, Z.           | 0      | 194   | 0.00       | [0.00; 0.02] | 0.7%           | 0.8%            |
| Hara, M.           | 1      | 252   | 0.00       | [0.00; 0.02] | 0.9%           | 0.9%            |
| Davis, L. A.       | 17     | 642   | 0.03       | [0.02; 0.04] | 2.3%           | 0.9%            |
| Nikiphorou, E.     | 24     | 762   | 0.03       | [0.02; 0.05] | 2.7%           | 0.9%            |
| Sotoudehmanesh, R. | 1      | 286   | 0.00       | [0.00; 0.02] | 1.0%           | 0.9%            |
| Keystone, E. C.    | 0      | 301   | 0.00       | [0.00; 0.01] | 1.1%           | 0.9%            |
| ?wierkot, J.       | 5      | 273   | 0.02       | [0.01; 0.04] | 1.0%           | 0.9%            |
| Genovese, M. C.    | 24     | 1282  | 0.02       | [0.01; 0.03] | 4.5%           | 1.0%            |
| Muralidharan, N.   | 5      | 327   | 0.02       | [0.00; 0.04] | 1.2%           | 0.9%            |
| Yonemoto, Y.       | 0      | 83    | 0.00       | [0.00; 0.04] | 0.3%           | 0.7%            |
| Migita, K.         | 0      | 79    | 0.00       | [0.00; 0.05] | 0.3%           | 0.7%            |
| Muralidharan, N.   | 5      | 319   | 0.02       | [0.01; 0.04] | 1.1%           | 0.9%            |
| Genovese, M. C.    | 0      | 300   | 0.00       | [0.00; 0.01] | 1.1%           | 0.9%            |
| Kivitz, A. J.      | 0      | 378   | 0.00       | [0.00; 0.01] | 1.3%           | 0.9%            |
| Muralidharan, N.   | 5      | 254   | 0.02       | [0.01; 0.05] | 0.9%           | 0.9%            |
| Ikeda, K.          | 0      | 56    | 0.00       | [0.00; 0.06] | 0.2%           | 0.6%            |
| ?wierkot, J.       | 11     | 1781  | 0.01       | [0.00; 0.01] | 6.3%           | 1.0%            |
| Mori, S.           | 0      | 846   | 0.00       | [0.00; 0.00] | 3.0%           | 0.9%            |
| Vejnovi?, D.       | 0      | 234   | 0.00       | [0.00; 0.02] | 0.8%           | 0.9%            |
| Huang, R. Y.       | 2      | 120   | 0.02       | [0.00; 0.06] | 0.4%           | 0.8%            |
| Robinson, M. F.    | 0      | 70    | 0.00       | [0.00; 0.05] | 0.2%           | 0.7%            |
| Youness, E. R.     | 3      | 40    | 0.07       | [0.02; 0.20] | 0.1%           | 0.5%            |
| Harrison, P. V.    | 0      | 24    | 0.00       | [0.00; 0.14] | 0.1%           | 0.4%            |
| Lanse, S. B.       | 1      | 30    | 0.03       | [0.00; 0.17] | 0.1%           | 0.5%            |
| Morison, W. L.     | 0      | 30    | 0.00       | [0.00; 0.12] | 0.1%           | 0.5%            |
| Paul, B. S.        | 0      | 26    | 0.00       | [0.00; 0.13] | 0.1%           | 0.4%            |
| Heydendael, V. M.  | 12     | 44    | 0.27       | [0.15; 0.43] | 0.2%           | 0.6%            |
| Shehzad, T.        | 0      | 40    | 0.00       | [0.00; 0.09] | 0.1%           | 0.5%            |
| Flytstr?m, I.      | 0      | 37    | 0.00       | [0.00; 0.09] | 0.1%           | 0.5%            |
| Saurat, J. H.      | 3      | 110   | 0.03       | [0.01; 0.08] | 0.4%           | 0.7%            |
| Kaur, I.           | 0      | 24    | 0.00       | [0.00; 0.14] | 0.1%           | 0.4%            |
| Fallah Arani, S.   | 2      | 27    | 0.07       | [0.01; 0.24] | 0.1%           | 0.4%            |
| Saurat, J. H.      | 3      | 103   | 0.03       | [0.01; 0.08] | 0.4%           | 0.7%            |
| Gupta, S. K.       | 0      | 86    | 0.00       | [0.00; 0.04] | 0.3%           | 0.7%            |
| Barker, J.         | 3      | 215   | 0.01       | [0.00; 0.04] | 0.8%           | 0.8%            |
| Reich, K.          | 2      | 163   | 0.01       | [0.00; 0.04] | 0.6%           | 0.8%            |
| Woolf, R. T.       | 3      | 55    | 0.05       | [0.01; 0.15] | 0.2%           | 0.6%            |
| Inzinger, M.       | 7      | 72    | 0.10       | [0.04; 0.19] | 0.3%           | 0.7%            |
| Dogra, S.          | 2      | 60    | 0.03       | [0.00; 0.12] | 0.2%           | 0.6%            |
| Tamilselvi, E.     | 2      | 58    | 0.03       | [0.00; 0.12] | 0.2%           | 0.6%            |
| Al-Hamamy, H. R.   | 0      | 75    | 0.00       | [0.00; 0.05] | 0.3%           | 0.7%            |
| Lynch, M.          | 2      | 77    | 0.03       | [0.00; 0.09] | 0.3%           | 0.7%            |
| Lajevardi, V.      | 1      | 44    | 0.02       | [0.00; 0.12] | 0.2%           | 0.6%            |
| Haider, S.         | 13     | 86    | 0.15       | [0.08; 0.24] | 0.3%           | 0.7%            |
| van Geel, M. J.    | 1      | 25    | 0.04       | [0.00; 0.20] | 0.1%           | 0.4%            |
| Singh, S. K.       | 7      | 141   | 0.05       | [0.02; 0.10] | 0.5%           | 0.8%            |
| West, J.           | 30     | 400   | 0.07       | [0.05; 0.11] | 1.4%           | 0.9%            |
| Cabello Zurita, C. | 6      | 218   | 0.03       | [0.01; 0.06] | 0.8%           | 0.8%            |
| Warren, R. B.      | 11     | 91    | 0.12       | [0.06; 0.21] | 0.3%           | 0.7%            |
| Otero, M. E.       | 2      | 85    | 0.02       | [0.00; 0.08] | 0.3%           | 0.7%            |
| Papp, K.           | 0      | 37    | 0.00       | [0.00; 0.09] | 0.1%           | 0.5%            |
| Ghariani, N.       | 0      | 91    | 0.00       | [0.00; 0.04] | 0.3%           | 0.7%            |
| Pongparit, K.      | 5      | 100   | 0.05       | [0.02; 0.11] | 0.4%           | 0.7%            |
| Santos, F. C. F.   | 0      | 256   | 0.00       | [0.00; 0.01] | 0.9%           | 0.9%            |
| Van, E. D.         | 0      | 70    | 0.00       | [0.00; 0.05] | 0.2%           | 0.7%            |
| Abidi, A.          | 0      | 60    | 0.00       | [0.00; 0.06] | 0.2%           | 0.6%            |
| Gisondi, P.        | 4      | 64    | 0.06       | [0.02; 0.15] | 0.2%           | 0.6%            |
| Shah, S.           | 0      | 21    | 0.00       | [0.00; 0.16] | 0.1%           | 0.4%            |
| Wysoczanska, B.    | 0      | 40    | 0.00       | [0.00; 0.09] | 0.1%           | 0.5%            |
| Mease, P. J.       | 1      | 185   | 0.01       | [0.00; 0.03] | 0.7%           | 0.8%            |
| Tilling, L.        | 4      | 69    | 0.06       | [0.02; 0.14] | 0.2%           | 0.7%            |
| Heiberg, M. S.     | 7      | 384   | 0.02       | [0.01; 0.04] | 1.4%           | 0.9%            |
| Scarpa, R.         | 0      | 32    | 0.00       | [0.00; 0.11] | 0.1%           | 0.5%            |
| Malesci, D.        | 4      | 44    | 0.09       | [0.03; 0.22] | 0.2%           | 0.6%            |
| Lie, E.            | 20     | 430   | 0.05       | [0.03; 0.07] | 1.5%           | 0.9%            |
| Nikiphorou, E.     | 12     | 193   | 0.06       | [0.03; 0.11] | 0.7%           | 0.8%            |
| Coates, L. C.      | 4      | 188   | 0.02       | [0.01; 0.05] | 0.7%           | 0.8%            |
| Sheane, B. J.      | 4      | 167   | 0.02       | [0.01; 0.06] | 0.6%           | 0.8%            |
| Mease, P. J.       | 0      | 240   | 0.00       | [0.00; 0.02] | 0.9%           | 0.9%            |
| Appani, S. K.      | 0      | 73    | 0.00       | [0.00; 0.05] | 0.3%           | 0.7%            |
| Yan, K.            | 0      | 235   | 0.00       | [0.00; 0.02] | 0.8%           | 0.9%            |
| Mease, P. J.       | 0      | 567   | 0.00       | [0.00; 0.01] | 2.0%           | 0.9%            |
| Stolshek, B. S.    | 8      | 51    | 0.16       | [0.07; 0.29] | 0.2%           | 0.6%            |
| de Jong, H. M. Y.  | 1      | 51    | 0.02       | [0.00; 0.10] | 0.2%           | 0.6%            |

Fixed effect model 28159 0.01 [0.01; 0.01] 100.0% --  
Random effects model 0.02 [0.01; 0.02] -- 100.0%

Heterogeneity:  $I^2 = 85\%$ ,  $\tau^2 = 0.0072$ ,  $p < 0.01$

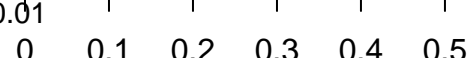

Supplement: Image_4.pdf [file Image_4.pdf]
