# Supplementary material for: Patients With IBD Receiving Methotrexate Are at Higher Risk of Liver Injury Compared With Patients With Non-IBD Diseases: A Meta-Analysis and Systematic Review
Source: PubMed Central journal article supplement (PMC8645797; doi:10.3389/fmed.2021.774824), 2021-11-22
Supplement: Image_2.pdf [file Image_2.pdf]

| Study              | Events | Total | Proportion | 95%-CI       | Weight (fixed) | Weight (random) |
|--------------------|--------|-------|------------|--------------|----------------|-----------------|
| Williams, H. J.    | 12     | 220   | 0.05       | [0.03; 0.09] | 0.2%           | 0.5%            |
| Graham, L. D.      | 9      | 62    | 0.15       | [0.07; 0.26] | 0.1%           | 0.4%            |
| Weinblatt, M. E.   | 2      | 26    | 0.08       | [0.01; 0.25] | 0.0%           | 0.3%            |
| Morgan, S. L.      | 0      | 22    | 0.00       | [0.00; 0.15] | 0.0%           | 0.3%            |
| Weinblatt, M. E.   | 33     | 138   | 0.24       | [0.17; 0.32] | 0.1%           | 0.4%            |
| Drosos, A. A.      | 34     | 137   | 0.25       | [0.18; 0.33] | 0.1%           | 0.4%            |
| Willkens, R. F.    | 47     | 52    | 0.90       | [0.79; 0.97] | 0.0%           | 0.4%            |
| Wallace, C. A.     | 10     | 23    | 0.43       | [0.23; 0.66] | 0.0%           | 0.3%            |
| McKendry, R. J.    | 76     | 94    | 0.81       | [0.71; 0.88] | 0.1%           | 0.4%            |
| Shergy, W. J.      | 6      | 24    | 0.03       | [0.01; 0.06] | 0.0%           | 0.5%            |
| Bjorkman, D. J.    | 7      | 210   | 0.29       | [0.13; 0.51] | 0.2%           | 0.3%            |
| Tishler, M.        | 15     | 44    | 0.34       | [0.20; 0.50] | 0.0%           | 0.4%            |
| Leonard, P. A.     | 95     | 163   | 0.58       | [0.50; 0.66] | 0.1%           | 0.5%            |
| Kremer, J. M.      | 20     | 29    | 0.69       | [0.49; 0.85] | 0.0%           | 0.3%            |
| Williams, H. J.    | 18     | 95    | 0.19       | [0.12; 0.28] | 0.1%           | 0.4%            |
| Weinstein, A.      | 12     | 25    | 0.48       | [0.28; 0.69] | 0.0%           | 0.3%            |
| Hoffmeister, R. T. | 7      | 78    | 0.09       | [0.04; 0.18] | 0.1%           | 0.4%            |
| Schnabel, A.       | 70     | 185   | 0.38       | [0.31; 0.45] | 0.2%           | 0.5%            |
| O'Dell, J. R.      | 0      | 36    | 0.00       | [0.00; 0.10] | 0.0%           | 0.4%            |
| Schnabel, A.       | 87     | 185   | 0.47       | [0.40; 0.54] | 0.2%           | 0.5%            |
| Beyeler, C.        | 7      | 117   | 0.06       | [0.02; 0.12] | 0.1%           | 0.4%            |
| Rau, R.            | 30     | 87    | 0.34       | [0.25; 0.45] | 0.1%           | 0.4%            |
| Boers, M.          | 2      | 76    | 0.03       | [0.00; 0.09] | 0.1%           | 0.4%            |
| Haagsma, C. J.     | 7      | 71    | 0.10       | [0.04; 0.19] | 0.1%           | 0.4%            |
| Ali, A. A.         | 2      | 124   | 0.02       | [0.00; 0.06] | 0.1%           | 0.4%            |
| Dougados, M.       | 1      | 69    | 0.01       | [0.00; 0.08] | 0.1%           | 0.4%            |
| Suzuki, Y.         | 67     | 1047  | 0.06       | [0.05; 0.08] | 0.9%           | 0.5%            |
| Strand, V.         | 17     | 182   | 0.09       | [0.06; 0.15] | 0.2%           | 0.5%            |
| Coleiro, B.        | 19     | 33    | 0.58       | [0.39; 0.75] | 0.0%           | 0.3%            |
| Baraldo, M.        | 0      | 30    | 0.00       | [0.00; 0.12] | 0.0%           | 0.3%            |
| Richard, S.        | 10     | 57    | 0.18       | [0.09; 0.30] | 0.0%           | 0.4%            |
| Lerndal, T.        | 11     | 50    | 0.22       | [0.12; 0.36] | 0.0%           | 0.4%            |
| Emery, P.          | 19     | 320   | 0.06       | [0.04; 0.09] | 0.3%           | 0.5%            |
| Hirshberg, B.      | 2      | 33    | 0.06       | [0.01; 0.20] | 0.0%           | 0.3%            |
| van Ede, A. E.     | 41     | 274   | 0.15       | [0.11; 0.20] | 0.2%           | 0.5%            |
| Cohen, S.          | 9      | 190   | 0.05       | [0.02; 0.09] | 0.2%           | 0.5%            |
| van Ede, A. E.     | 68     | 236   | 0.29       | [0.23; 0.35] | 0.2%           | 0.5%            |
| Urano, W.          | 12     | 106   | 0.11       | [0.06; 0.19] | 0.1%           | 0.4%            |
| van Ede, A. E.     | 15     | 113   | 0.13       | [0.08; 0.21] | 0.1%           | 0.4%            |
| Pandya, S.         | 10     | 80    | 0.12       | [0.06; 0.22] | 0.1%           | 0.4%            |
| Fathi, N. H.       | 92     | 192   | 0.48       | [0.41; 0.55] | 0.2%           | 0.5%            |
| Kremer, J. M.      | 9      | 133   | 0.07       | [0.03; 0.12] | 0.1%           | 0.4%            |
| van Ede, A. E.     | 14     | 103   | 0.14       | [0.08; 0.22] | 0.1%           | 0.4%            |
| Weinblatt, M. E.   | 0      | 271   | 0.00       | [0.00; 0.11] | 0.2%           | 0.5%            |
| Gerards, A. H.     | 7      | 60    | 0.12       | [0.05; 0.23] | 0.1%           | 0.4%            |
| Hoekstra, M.       | 11     | 274   | 0.04       | [0.02; 0.07] | 0.2%           | 0.5%            |
| Weisman, M. H.     | 0      | 60    | 0.00       | [0.00; 0.06] | 0.1%           | 0.4%            |
| Klareskog, L.      | 7      | 459   | 0.02       | [0.01; 0.03] | 0.4%           | 0.5%            |
| Kremer, J.         | 9      | 133   | 0.07       | [0.03; 0.12] | 0.1%           | 0.4%            |
| Silverman, E.      | 15     | 47    | 0.32       | [0.19; 0.47] | 0.0%           | 0.4%            |
| Yazici, Y.         | 30     | 182   | 0.16       | [0.11; 0.23] | 0.2%           | 0.5%            |
| Breedveld, F. C.   | 2      | 525   | 0.00       | [0.00; 0.01] | 0.4%           | 0.5%            |
| Hughes, L. B.      | 8      | 362   | 0.02       | [0.01; 0.04] | 0.3%           | 0.5%            |
| Weisman, M. H.     | 15     | 214   | 0.07       | [0.04; 0.11] | 0.2%           | 0.5%            |
| O'Dell, J. R.      | 2      | 64    | 0.03       | [0.00; 0.11] | 0.1%           | 0.4%            |
| Wessels, J. A.     | 18     | 205   | 0.09       | [0.05; 0.14] | 0.2%           | 0.5%            |
| Maini, R. N.       | 15     | 200   | 0.07       | [0.04; 0.12] | 0.2%           | 0.5%            |
| Wessels, J. A.     | 16     | 205   | 0.08       | [0.05; 0.12] | 0.2%           | 0.5%            |
| Tilling, L.        | 41     | 500   | 0.07       | [0.05; 0.10] | 0.5%           | 0.5%            |
| Takatori, R.       | 31     | 124   | 0.25       | [0.18; 0.34] | 0.1%           | 0.4%            |
| Drozdzik, M.       | 10     | 174   | 0.06       | [0.03; 0.10] | 0.1%           | 0.5%            |
| van Dongen, H.     | 6      | 55    | 0.11       | [0.04; 0.22] | 0.0%           | 0.4%            |
| Taniguchi, A.      | 37     | 159   | 0.23       | [0.17; 0.31] | 0.1%           | 0.5%            |
| Berkun, Y.         | 3      | 86    | 0.03       | [0.01; 0.10] | 0.1%           | 0.4%            |
| Mor, A.            | 5      | 44    | 0.11       | [0.04; 0.25] | 0.0%           | 0.4%            |
| Braun, J.          | 11     | 375   | 0.03       | [0.01; 0.05] | 0.3%           | 0.5%            |
| Ranganathan, P.    | 49     | 218   | 0.22       | [0.17; 0.29] | 0.2%           | 0.5%            |
| Zhang, L. L.       | 5      | 106   | 0.05       | [0.02; 0.11] | 0.1%           | 0.4%            |
| Bohanec Grabar, P. | 56     | 213   | 0.26       | [0.21; 0.33] | 0.2%           | 0.5%            |
| Hu, D.             | 18     | 120   | 0.15       | [0.09; 0.23] | 0.1%           | 0.4%            |
| Nishimoto, N.      | 11     | 62    | 0.18       | [0.09; 0.30] | 0.1%           | 0.4%            |
| Keystone, E. C.    | 0      | 311   | 0.00       | [0.00; 0.01] | 0.3%           | 0.5%            |
| Cohen, S. B.       | 6      | 53    | 0.11       | [0.04; 0.23] | 0.0%           | 0.4%            |
| Lee, S. S.         | 16     | 74    | 0.22       | [0.13; 0.33] | 0.1%           | 0.4%            |
| Jones, G.          | 96     | 284   | 0.34       | [0.28; 0.40] | 0.2%           | 0.5%            |
| Alten, R. E.       | 20     | 327   | 0.06       | [0.04; 0.09] | 0.3%           | 0.5%            |
| Lu, L. J.          | 39     | 163   | 0.24       | [0.18; 0.31] | 0.1%           | 0.5%            |
| Verstappen, S. M.  | 110    | 289   | 0.38       | [0.32; 0.44] | 0.2%           | 0.5%            |
| Emery, P.          | 10     | 160   | 0.06       | [0.03; 0.11] | 0.1%           | 0.5%            |
| Lie, E.            | 67     | 1218  | 0.06       | [0.04; 0.07] | 1.0%           | 0.5%            |
| Dervieux, T.       | 1      | 255   | 0.00       | [0.00; 0.02] | 0.2%           | 0.5%            |
| Wei, W.            | 10     | 177   | 0.06       | [0.03; 0.10] | 0.1%           | 0.5%            |
| Mena, J. P.        | 13     | 70    | 0.19       | [0.10; 0.30] | 0.1%           | 0.4%            |
| Hayashi, T.        | 2      | 82    | 0.02       | [0.00; 0.09] | 0.1%           | 0.4%            |
| Migliore, A.       | 0      | 21    | 0.00       | [0.00; 0.16] | 0.0%           | 0.3%            |
| Ishaq, M.          | 14     | 111   | 0.13       | [0.07; 0.20] | 0.1%           | 0.4%            |
| Salesi, M.         | 9      | 117   | 0.08       | [0.04; 0.14] | 0.1%           | 0.4%            |
| Tanaka, Y.         | 12     | 136   | 0.09       | [0.05; 0.15] | 0.1%           | 0.4%            |
| Kremer, J. M.      | 11     | 507   | 0.02       | [0.01; 0.04] | 0.4%           | 0.5%            |
| Cáliz, R.          | 13     | 468   | 0.03       | [0.01; 0.05] | 0.4%           | 0.5%            |
| Ta?ba?, O.         | 6      | 64    | 0.09       | [0.04; 0.19] | 0.1%           | 0.4%            |
| Gilani, S. T.      | 12     | 140   | 0.09       | [0.05; 0.14] | 0.1%           | 0.4%            |
| Mease, P.          | 0      | 33    | 0.00       | [0.00; 0.11] | 0.0%           | 0.3%            |
| Takeuchi, T.       | 22     | 176   | 0.12       | [0.08; 0.18] | 0.1%           | 0.5%            |
| Chen, X. X.        | 42     | 264   | 0.16       | [0.12; 0.21] | 0.2%           | 0.5%            |
| Plaza-Plaza, J. C. | 21     | 53    | 0.40       | [0.26; 0.54] | 0.0%           | 0.4%            |
| Dirven, L.         | 89     | 498   | 0.18       | [0.15; 0.22] | 0.4%           | 0.5%            |
| Burmester, G. R.   | 62     | 399   | 0.16       | [0.12; 0.19] | 0.3%           | 0.5%            |
| Bird, P.           | 265    | 1967  | 0.13       | [0.12; 0.15] | 1.7%           | 0.5%            |
| van der Heijde, D. | 160    | 797   | 0.20       | [0.17; 0.23] | 0.7%           | 0.5%            |
| Chen, Z.           | 41     | 194   | 0.21       | [0.16; 0.28] | 0.2%           | 0.5%            |
| Chen, L.           | 52     | 403   | 0.13       | [0.10; 0.17] | 0.3%           | 0.5%            |
| de Rotte, M. C.    | 5      | 387   | 0.01       | [0.00; 0.03] | 0.3%           | 0.5%            |
| Hara, M.           | 35     | 252   | 0.14       | [0.10; 0.19] | 0.2%           | 0.5%            |
| Huizinga, T. W.    | 9      | 306   | 0.03       | [0.01; 0.06] | 0.3%           | 0.5%            |
| Yamamoto, K.       | 20     | 316   | 0.06       | [0.04; 0.10] | 0.3%           | 0.5%            |
| Davis, L. A.       | 168    | 642   | 0.26       | [0.23; 0.30] | 0.5%           | 0.5%            |
| Nikiphorou, E.     | 24     | 762   | 0.03       | [0.02; 0.05] | 0.6%           | 0.5%            |
| Ding, C. Z.        | 31     | 266   | 0.12       | [0.08; 0.16] | 0.2%           | 0.5%            |
| Lee, E. B.         | 11     | 186   | 0.06       | [0.03; 0.10] | 0.2%           | 0.5%            |
| Dhir, V.           | 13     | 100   | 0.13       | [0.07; 0.21] | 0.1%           | 0.4%            |
| Lima, A.           | 5      | 233   | 0.02       | [0.01; 0.05] | 0.2%           | 0.5%            |
| Sotoudehmanesh, R. | 68     | 286   | 0.24       | [0.19; 0.29] | 0.2%           | 0.5%            |
| Weinblatt, M. E.   | 42     | 918   | 0.05       | [0.03; 0.06] | 0.8%           | 0.5%            |
| Lima, A.           | 5      | 233   | 0.02       | [0.01; 0.05] | 0.2%           | 0.5%            |
| Keystone, E. C.    | 78     | 301   | 0.26       | [0.21; 0.31] | 0.3%           | 0.5%            |
| ?wierkot, J.       | 18     | 273   | 0.07       | [0.04; 0.10] | 0.2%           | 0.5%            |
| Soukup, T.         | 0      | 120   | 0.00       | [0.00; 0.03] | 0.1%           | 0.4%            |
| Genovese, M. C.    | 84     | 1282  | 0.07       | [0.05; 0.08] | 1.1%           | 0.5%            |
| Muralidharan, N.   | 5      | 327   | 0.02       | [0.00; 0.04] | 0.3%           | 0.5%            |
| Yonemoto, Y.       | 0      | 83    | 0.00       | [0.00; 0.04] | 0.1%           | 0.4%            |
| Xiang, N.          | 44     | 268   | 0.16       | [0.12; 0.21] | 0.2%           | 0.5%            |
| Genovese, M. C.    | 11     | 358   | 0.03       | [0.02; 0.05] | 0.3%           | 0.5%            |
| Sugiyama, E.       | 27     | 194   | 0.14       | [0.09; 0.20] | 0.2%           | 0.5%            |
| Migita, K.         | 0      | 79    | 0.00       | [0.00; 0.05] | 0.1%           | 0.4%            |
| Muralidharan, N.   | 5      | 319   | 0.02       | [0.01; 0.04] | 0.3%           | 0.5%            |
| Genovese, M. C.    | 3      | 300   | 0.01       | [0.00; 0.03] | 0.3%           | 0.5%            |
| Lima, A.           | 5      | 233   | 0.02       | [0.01; 0.05] | 0.2%           | 0.5%            |
| Kivitz, A. J.      | 0      | 378   | 0.00       | [0.00; 0.01] | 0.3%           | 0.5%            |
| Westhovens, R.     | 61     | 594   | 0.10       | [0.08; 0.13] | 0.5%           | 0.5%            |
| Takahashi, C.      | 20     | 79    | 0.25       | [0.16; 0.36] | 0.1%           | 0.4%            |
| He, L.             | 2      | 110   | 0.02       | [0.00; 0.06] | 0.1%           | 0.4%            |
| Humphreys, J. H.   | 530    | 11839 | 0.04       | [0.04; 0.05] | 9.9%           | 0.5%            |
| Muralidharan, N.   | 5      | 254   | 0.02       | [0.01; 0.05] | 0.2%           | 0.5%            |
| Ikedo, K.          | 0      | 56    | 0.00       | [0.00; 0.06] | 0.0%           | 0.4%            |
| Kameyama, S.       | 13     | 125   | 0.10       | [0.06; 0.17] | 0.1%           | 0.4%            |
| Khan, Haek         | 32     | 114   | 0.28       | [0.20; 0.37] | 0.1%           | 0.4%            |
| ?wierkot, J.       | 95     | 1781  | 0.05       | [0.04; 0.06] | 1.5%           | 0.5%            |
| Genovese, M. C.    | 135    | 1197  | 0.11       | [0.10; 0.13] | 1.0%           | 0.5%            |
| Stamp, L. K.       | 8      | 40    | 0.20       | [0.09; 0.36] | 0.0%           | 0.4%            |
| Mori, S.           | 51     | 846   | 0.06       | [0.05; 0.08] | 0.7%           | 0.5%            |
| Harris, E.         | 219    | 12796 | 0.02       | [0.01; 0.02] | 10.7%          | 0.5%            |
| Lv, S.             | 12     | 162   | 0.07       | [0.04; 0.13] | 0.1%           | 0.4%            |
| Vejnovi?, D.       | 24     | 234   | 0.10       | [0.07; 0.15] | 0.2%           | 0.5%            |
| Huang, R. Y.       | 13     | 120   | 0.11       | [0.06; 0.18] | 0.1%           | 0.4%            |
| Fleischmann, R.    | 87     | 1629  | 0.05       | [0.04; 0.07] | 1.4%           | 0.5%            |
| Onishi, A.         | 54     | 166   | 0.33       | [0.25; 0.40] | 0.1%           | 0.5%            |
| Sundbaum, J. K.    | 34     | 369   | 0.09       | [0.06; 0.13] | 0.3%           | 0.5%            |
| Robinson, M. F.    | 1      | 70    | 0.01       | [0.00; 0.08] | 0.1%           | 0.4%            |
| Hua, L.            | 8      | 80    | 0.10       | [0.04; 0.19] | 0.1%           | 0.4%            |
| Nagaoka, S.        | 8      | 78    | 0.10       | [0.05; 0.19] | 0.1%           | 0.4%            |
| Gelfand, J. M.     | 537    | 28030 | 0.02       | [0.02; 0.02] | 23.5%          | 0.5%            |
| Youness, E. R.     | 10     | 40    | 0.25       | [0.13; 0.41] | 0.0%           | 0.4%            |
| Harrison, P. V.    | 0      | 24    | 0.00       | [0.00; 0.14] | 0.0%           | 0.3%            |
| Lanse, S. B.       | 6      | 30    | 0.20       | [0.08; 0.39] | 0.0%           | 0.3%            |
| Morison, W. L.     | 0      | 30    | 0.00       | [0.00; 0.12] | 0.0%           | 0.3%            |
| Geronemus, R. G.   | 7      | 24    | 0.29       | [0.13; 0.51] | 0.0%           | 0.3%            |
| Paul, B. S.        | 0      | 26    | 0.00       | [0.00; 0.13] | 0.0%           | 0.3%            |
| Robinson, J. K.    | 11     | 43    | 0.26       | [0.14; 0.41] | 0.0%           | 0.4%            |
| Kumar, B.          | 3      | 197   | 0.02       | [0.00; 0.04] | 0.2%           | 0.5%            |
| Heydendael, V. M.  | 12     | 44    | 0.27       | [0.15; 0.43] | 0.0%           | 0.4%            |
| Shehzad, T.        | 0      | 40    | 0.00       | [0.00; 0.09] | 0.0%           | 0.4%            |
| Aydin, F.          | 4      | 20    | 0.20       | [0.06; 0.44] | 0.0%           | 0.3%            |
| Gupta, R.          | 6      | 40    | 0.15       | [0.06; 0.30] | 0.0%           | 0.4%            |
| Flytstr?m, I.      | 7      | 37    | 0.19       | [0.08; 0.35] | 0.0%           | 0.4%            |
| Saurat, J. H.      | 3      | 110   | 0.03       | [0.01; 0.08] | 0.1%           | 0.4%            |
| Chládek, J.        | 3      | 20    | 0.15       | [0.03; 0.38] | 0.0%           | 0.3%            |
| Warren, R. B.      | 65     | 374   | 0.17       | [0.14; 0.22] | 0.3%           | 0.5%            |
| Kaur, I.           | 0      | 24    | 0.00       | [0.00; 0.14] | 0.0%           | 0.3%            |
| Amital, H.         | 271    | 690   | 0.39       | [0.36; 0.43] | 0.6%           | 0.5%            |
| Saurat, J. H.      | 114    | 5676  | 0.02       | [0.02; 0.02] | 4.8%           | 0.5%            |
| Fallah Arani, S.   | 12     | 27    | 0.44       | [0.25; 0.65] | 0.0%           | 0.3%            |
| Saurat, J. H.      | 4      | 103   | 0.04       | [0.01; 0.10] | 0.1%           | 0.4%            |
| Gupta, S. K.       | 0      | 86    | 0.00       | [0.00; 0.04] | 0.1%           | 0.4%            |
| Barker, J.         | 3      | 215   | 0.01       | [0.00; 0.04] | 0.2%           | 0.5%            |
| Radmanesh, M.      | 77     | 202   | 0.38       | [0.31; 0.45] | 0.2%           | 0.5%            |
| Reich, K.          | 16     | 163   | 0.10       | [0.06; 0.15] | 0.1%           | 0.4%            |
