# Supplementary material for: Patients With IBD Receiving Methotrexate Are at Higher Risk of Liver Injury Compared With Patients With Non-IBD Diseases: A Meta-Analysis and Systematic Review
Source: PubMed Central journal article supplement (PMC8645797; doi:10.3389/fmed.2021.774824), 2021-11-22

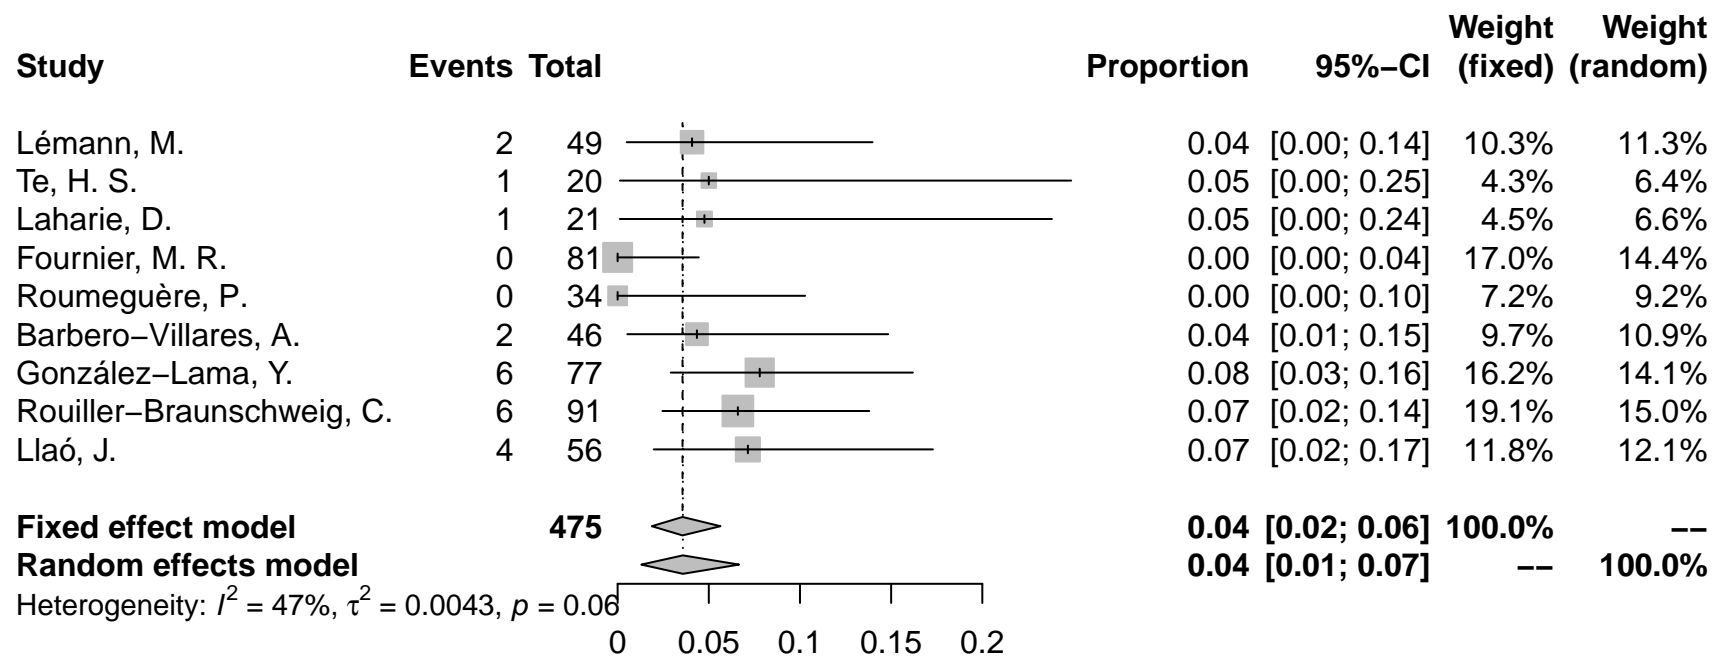

Supplement: Image_5.pdf [file Image_5.pdf]
